# Supplementary material
Source: Springer Nature journal article supplement (https://www.springermedizin.de/resource/supplementary/12957_2013_1417_MOESM1_ESM.pdf/9562534)

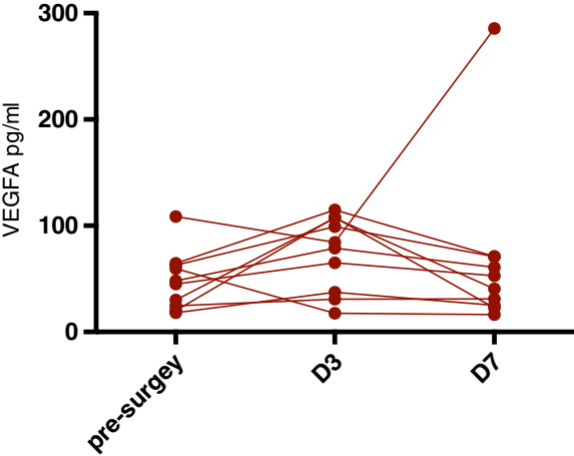

Supplement: MOESM1 [file 9562534]
